# Supplementary material
Source: PubMed Central journal article supplement (PMC2663758)
Supplement: pp.108.128884_2.pdf [file pp.108.128884_2.pdf]

## Supplementary material

**Figure 1S.** CPMG decays reported in a semi-logarithmic scale, relative to three leaves (a, b and c), of *Populus nigra* and the corresponding  $T_2$  distributions (d, e and f).
