# Supplementary material
Source: PubMed Central journal article supplement (PMC2663758)

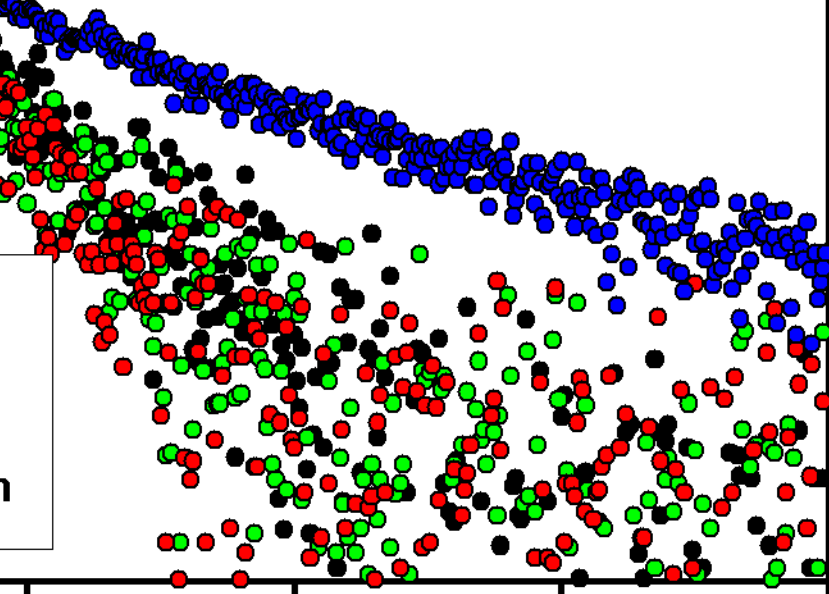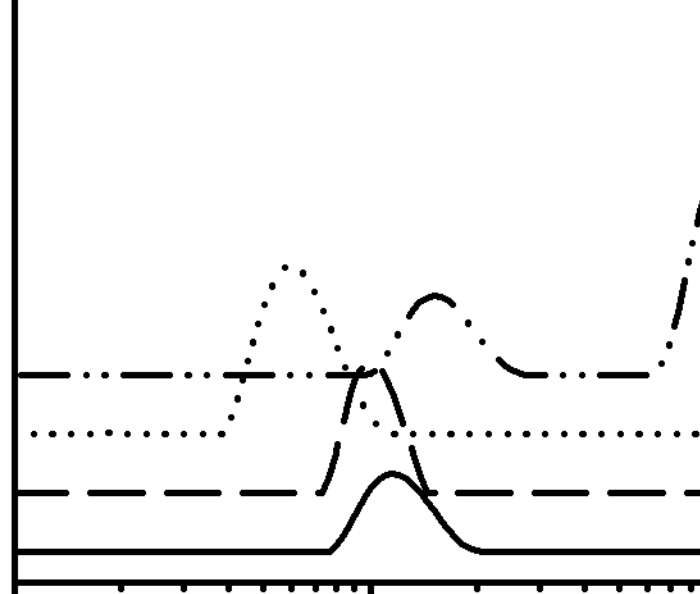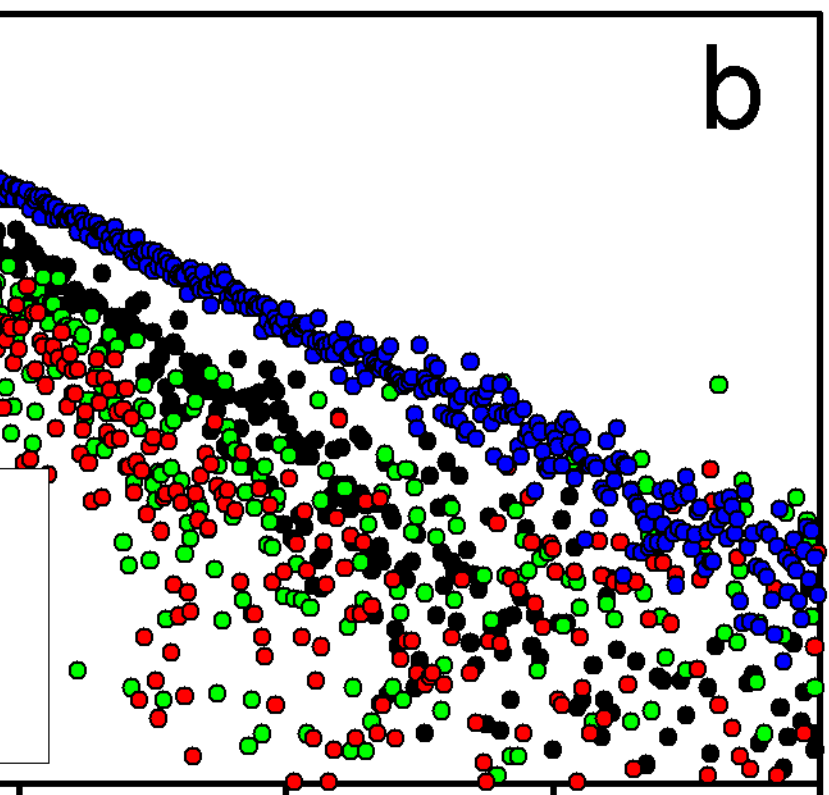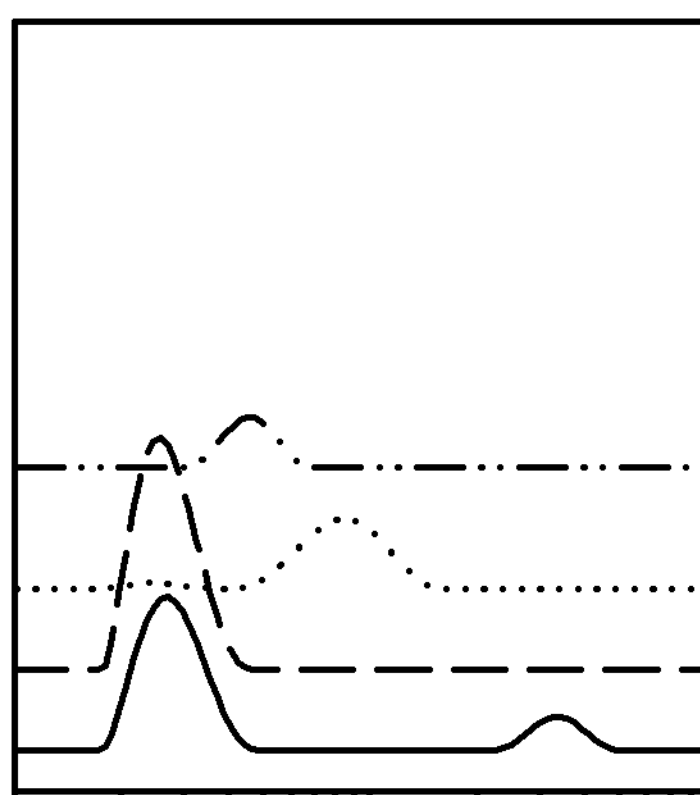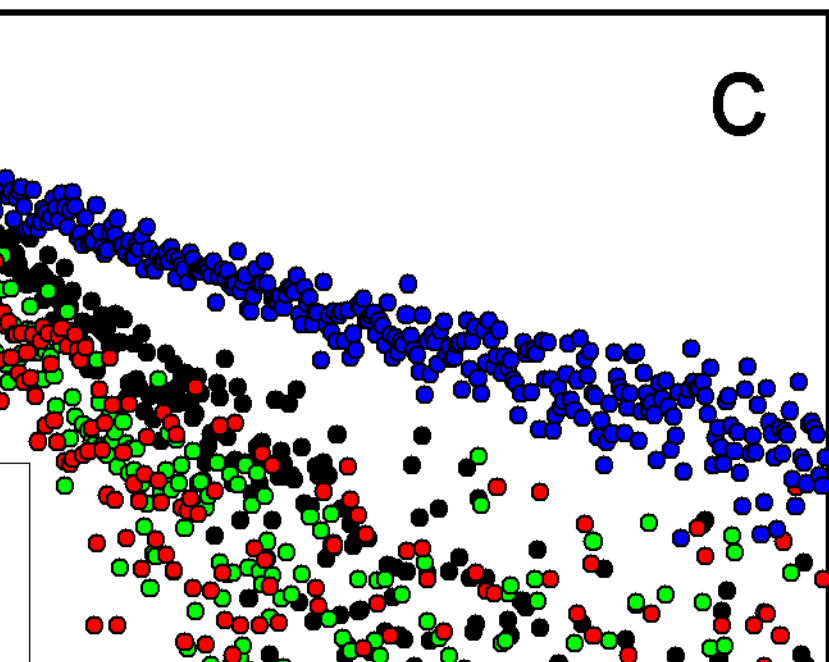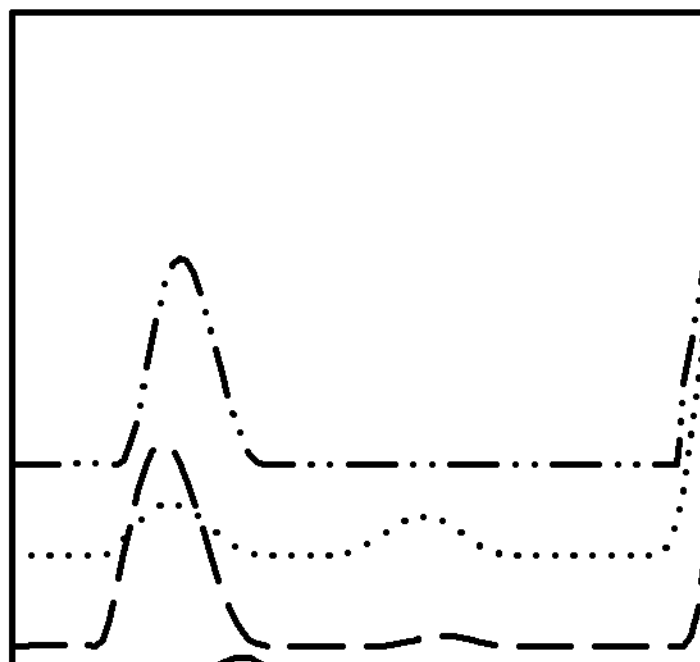

Supplement: pp.108.128884_1.pdf [file pp.108.128884_1.pdf]
